# Supplementary material for: Monitored Implementation of COVID-19 Rapid Antigen Screening at Taxi Ranks in Johannesburg, South Africa
Source: MDPI journal article supplement (doi:10.3390/diagnostics12020402), 2022-02-03
Supplement: s1 [file s1]

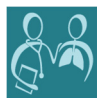

|                                   |   |                              |   |
|-----------------------------------|---|------------------------------|---|
| Date: DD/MM                       |   |                              |   |
| Symptoms (answer Y or N)          |   | Weekly/more often if desired |   |
| Fever/Chills                      | Y | /                            | N |
| Cough                             | Y | /                            | N |
| Sore throat                       | Y | /                            | N |
| Shortness of breath               | Y | /                            | N |
| Body aches                        | Y | /                            | N |
| Loss of smell OR loss of taste    | Y | /                            | N |
| Nausea/vomiting/diarrhoea         | Y | /                            | N |
| Fatigue/weakness                  | Y | /                            | N |
| Close contact with known Positive | Y | /                            | N |

Figure S1. Screening checklist.

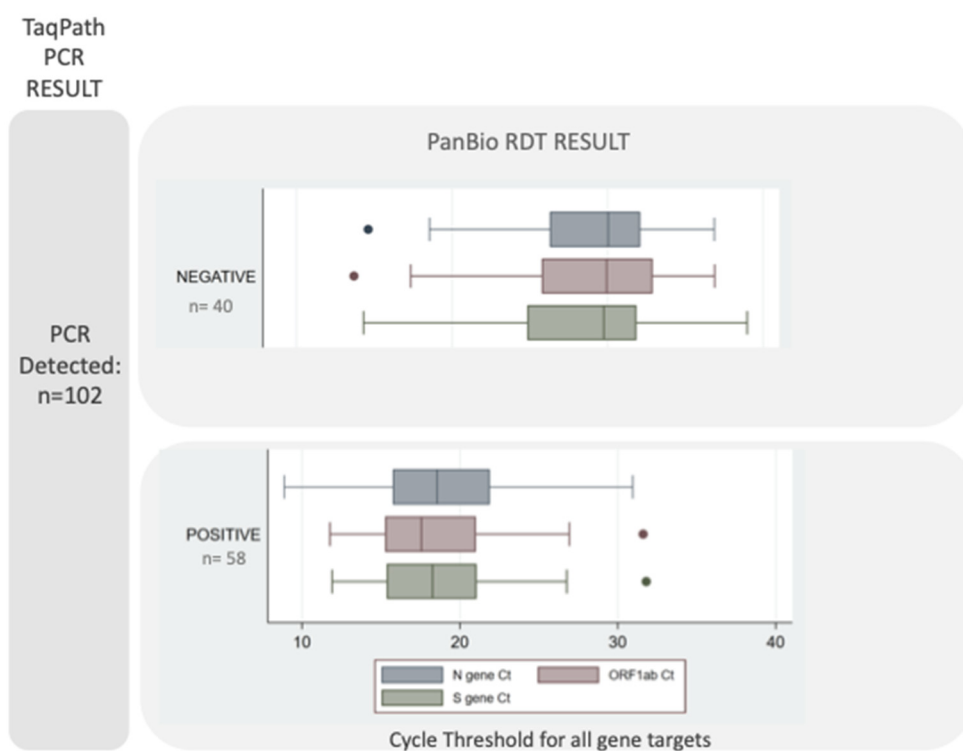

**Figure S2.** Cycle threshold breakdown by gene target for positive laboratory PCR results.
